# Supplementary material for: Single-Cell RNA Sequencing Reveals the Interaction of Injected ADSCs with Lung-Originated Cells in Mouse Pulmonary Fibrosis
Source: Hindawi journal article supplement (doi:10.1155/2022/9483166), 2022-04-11
Supplement: f1 [file 9483166.f1.pdf]

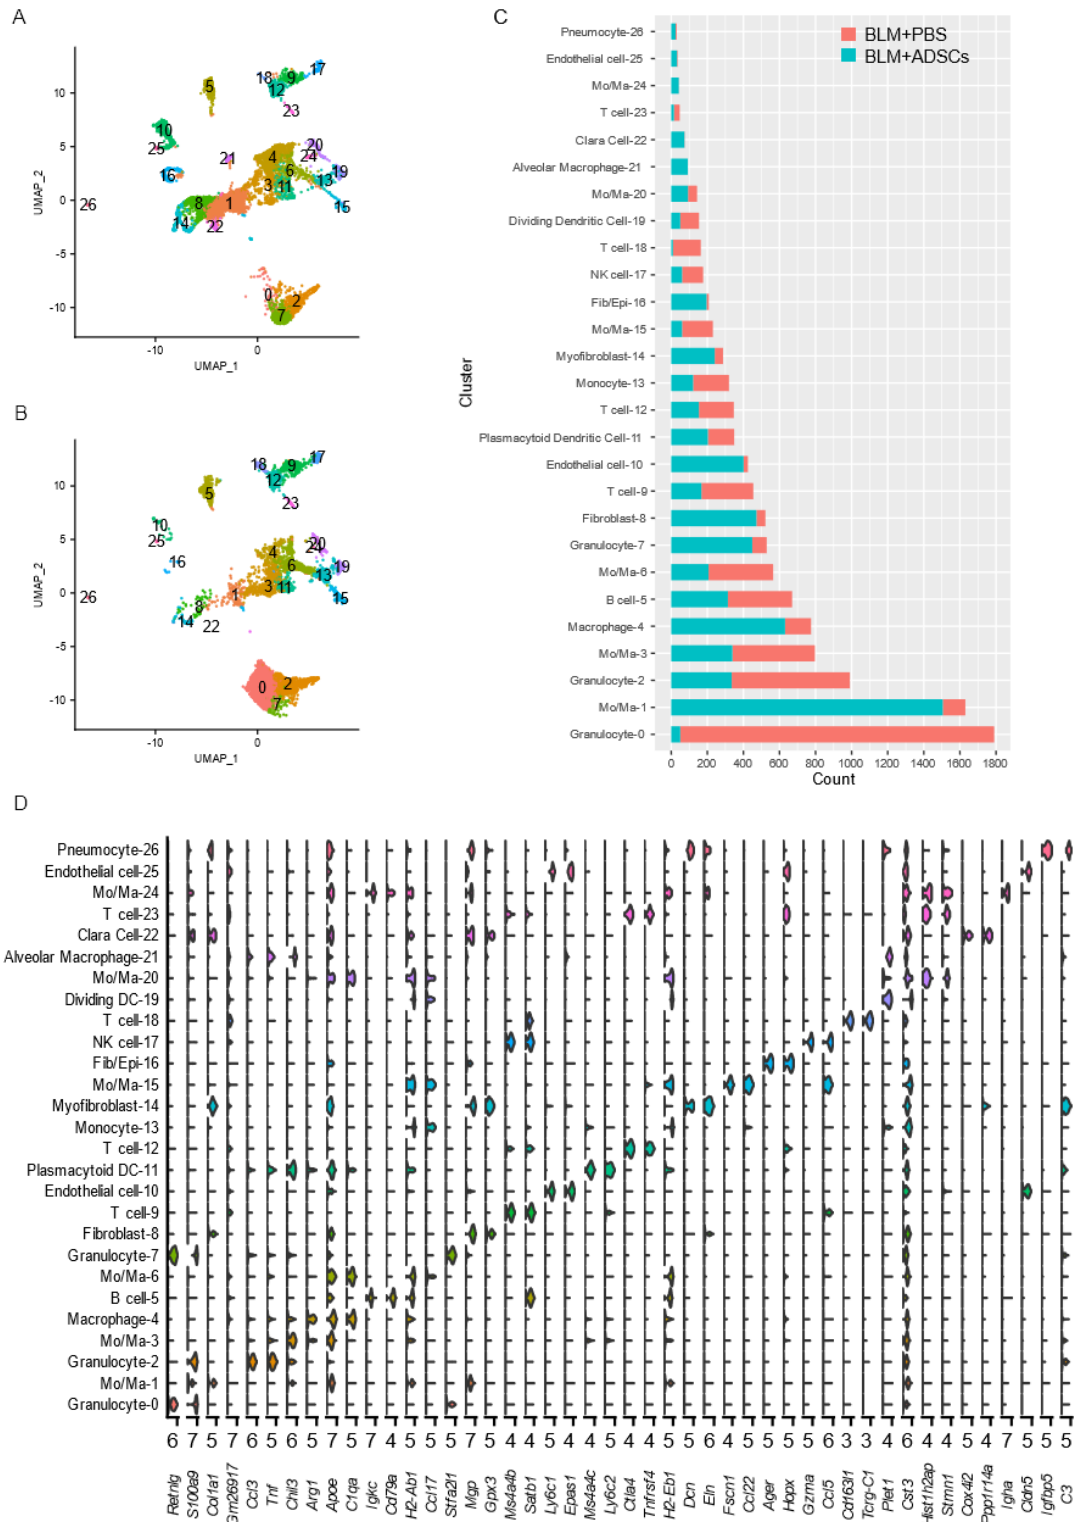

1  
2 **Supplementary Fig.1** Identification of 27 clusters of lung-originated cells in both  
3 groups of mice. **A,B.** UMAP distribution of all 27 clusters identified by Seurat in the  
4 merged dataset of BLM+ADSCs group (A) and BLM+PBS group (B). **C.** Cell counts  
5 in every cluster in each group. Cluster cell types were inferred by SingleR. **D.** Stacked  
6 violin plot of cluster marker genes (two marker genes for each cluster) and cell count  
7 number for each cluster of lung-originated cells.



13 genes for each cluster) in two ADSC groups. **D.** Signaling pathway network in  
14 BLM+ADSC group calculated by CellChat, showing signaling with recollected ADSCs  
15 (ADSC\_rec) as the receiver (NRG), and ADSC\_rec as the sender when lung-originated  
16 cells other than Macrophage-4 was the major receiver. Left column: sender, receiver,  
17 mediator and influencer of different pathways. Right column: relative contribution of  
18 each ligand-receptor pair in corresponding pathway network.

19
